# Supplementary material
Source: MDPI journal article supplement (https://www.mdpi.com/2073-4441/15/3/517)
Supplement: s1 [file s1]

## Supplementary Material

# Photodegradation of sulfamethoxazole and enrofloxacin under UV and simulated solar light irradiation

Xiaohu Lin<sup>1,2,3,\*</sup>, Wenming Zhou<sup>1,3</sup>, Shiyi Li<sup>1,3</sup>, Haifeng Fang<sup>1,3</sup>, Shengjie Fu<sup>1,3</sup>, Jingcheng Xu<sup>2,4,\*</sup> and Juwen Huang<sup>2,4</sup>

<sup>1</sup> PowerChina Huadong Engineering Corporation Limited, Hangzhou 311122, P. R. China; [tjhjxhlin@tongji.edu.cn](mailto:tjhjxhlin@tongji.edu.cn) (X.L.), [zhou\\_wm@hdec.com](mailto:zhou_wm@hdec.com) (W.Z.), [li\\_sy5@hdec.com](mailto:li_sy5@hdec.com) (S.L.), [fang\\_hf@hdec.com](mailto:fang_hf@hdec.com) (H.F.), [fu\\_sj@hdec.com](mailto:fu_sj@hdec.com) (S.F.)

<sup>2</sup> College of Environmental Science and Engineering, Tongji University, Shanghai 200092, P. R. China; [xujick@tongji.edu.cn](mailto:xujick@tongji.edu.cn) (J.X.), [jwhuang@tongji.edu.cn](mailto:jwhuang@tongji.edu.cn) (J.H.)

<sup>3</sup> Huadong Eco-environmental Engineering Research Institute of Zhejiang Province, Hangzhou 311122, China

<sup>4</sup> Shanghai Institute of Pollution Control and Ecological Security, Shanghai, 200092, China

\* Correspondence: [tjhjxhlin@tongji.edu.cn](mailto:tjhjxhlin@tongji.edu.cn) (X.L.), [xujick@tongji.edu.cn](mailto:xujick@tongji.edu.cn) (J.X.); Tel.: +86-0571-56613288 (X.L.); +86 021-65982010 (J.X.)

## **Table of contents**

**Table S1.** Details of the materials and reagents

**Figure S1.** Schematic diagram of the main part of photochemical reactor (NBcT, PhchemIII)

**Figure S2.** The UV-Vis spectra of SMX and ENR

**Table S1.** Details of the materials and reagents

| No. | Name                                                     | Specification                                                   | Source                                                   |
|-----|----------------------------------------------------------|-----------------------------------------------------------------|----------------------------------------------------------|
| 1   | Sodium nitrate (NaNO <sub>3</sub> )                      | Analytical Reagent, ≥99.0%                                      | Sinopharm Chemical Reagent Co., Ltd<br>(Shanghai, China) |
| 2   | Sodium sulphate (Na <sub>2</sub> SO <sub>4</sub> )       | Analytical Reagent                                              |                                                          |
| 3   | Sodium Carbonate (Na <sub>2</sub> CO <sub>3</sub> )      | Analytical Reagent                                              |                                                          |
| 4   | Sodium chloride (NaCl)                                   | Analytical Reagent                                              |                                                          |
| 5   | Dilute Hydrochloric Acid                                 | Analytical Reagent, 36.0~38.0%                                  |                                                          |
| 6   | Sodium hydroxide (NaOH)                                  | Analytical Reagent, ≥96.0%                                      |                                                          |
| 7   | 1,4-Benzoquinone                                         | Chemically Pure                                                 |                                                          |
| 8   | tert-Butanol (tBA)                                       | Analytical Reagent, ≥99.5%                                      |                                                          |
| 9   | Sulfamethoxazole (SMX)                                   | Analytical Reagent, 99%                                         | Aladdin Reagent Co., Ltd<br>(Shanghai)                   |
| 10  | Enrofloxacin (ENR)                                       | Analytical Reagent                                              |                                                          |
| 11  | Methanol                                                 | Chromatography grade                                            |                                                          |
| 12  | Formic acid                                              | for HPLC, ≥98%                                                  |                                                          |
| 13  | Isopropanol (IPA)                                        | Preparative chromatography grade, 99.8%                         |                                                          |
| 14  | Ethylenediaminetetraacetic acid disodium salt (EDTA-2Na) | GR, 99%                                                         |                                                          |
| 15  | Humic acid                                               | Fulvic acid (AF), ≥90%                                          | Sigma-Aldrich (Shanghai) Co., Ltd.                       |
| 16  | Acetonitrile                                             | Gradient grade, ≥99.9%                                          |                                                          |
| 17  | Ultrapure water                                          | Ultrapure water (resistivity 18.2 MΩ·cm <sup>-1</sup> at 25 °C) | Produced by Merck Millipore water purification system    |

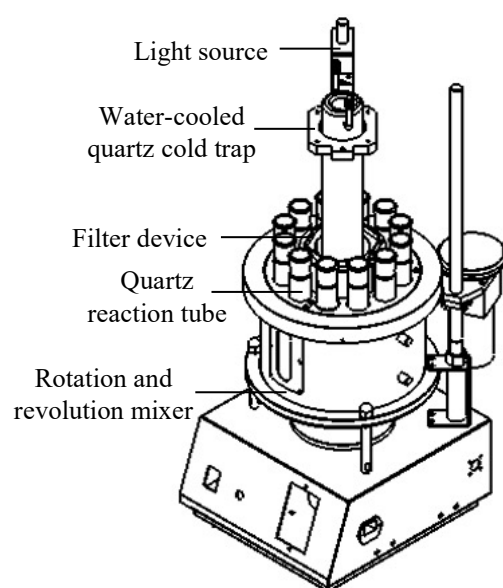

**Figure S1.** Schematic diagram of the main part of photochemical reactor (NBcT, PhchemIII)

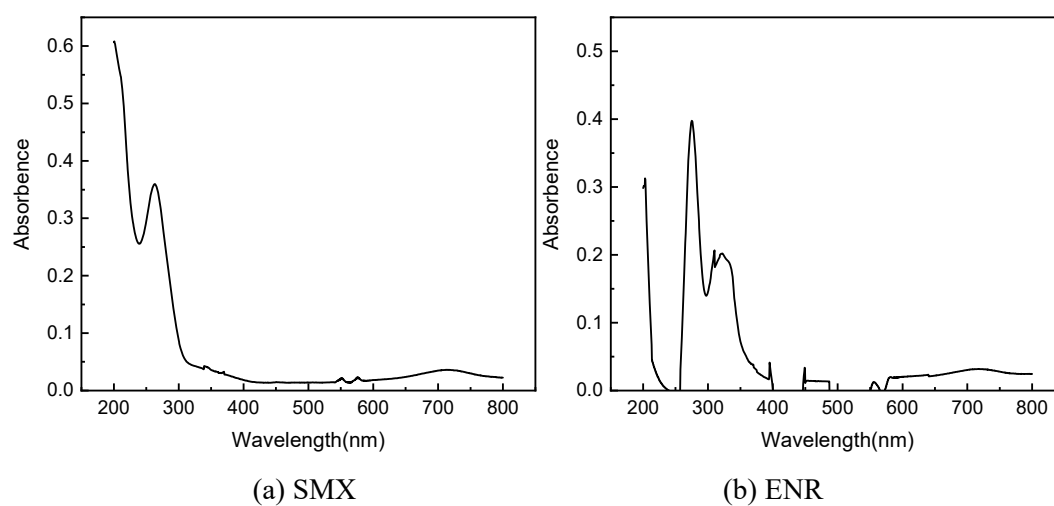

**Figure S2.** The UV-Vis spectra of SMX and ENR
